# Supplementary material
Source: PubMed Central journal article supplement (PMC7928023)

A)

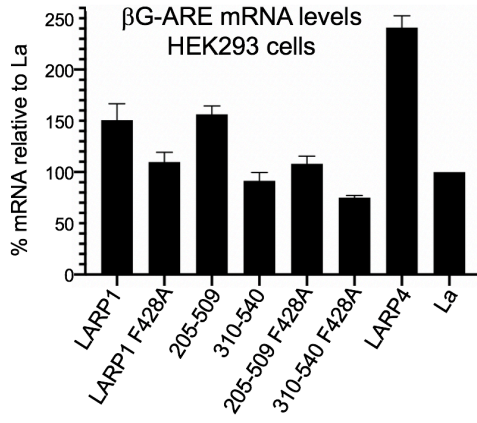

B)

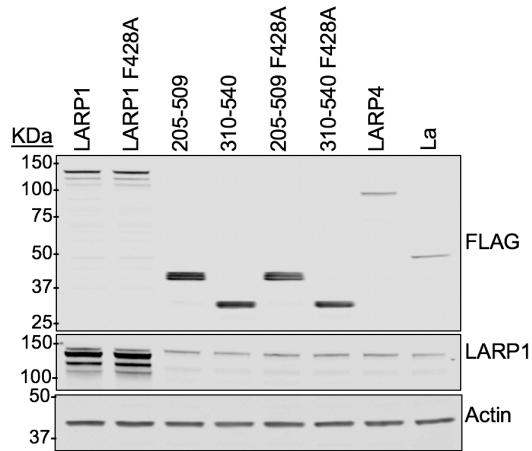

C)

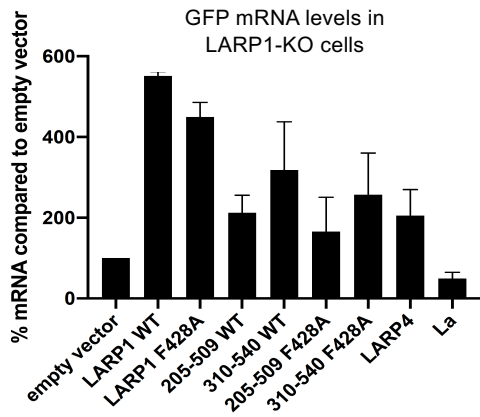

<sup>15</sup>N-MLLE domain + LARP1 417-437

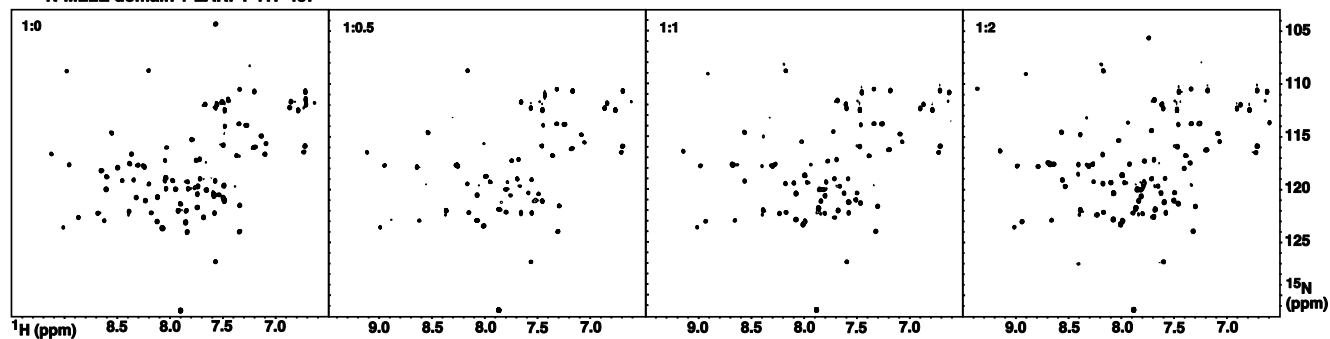

<sup>15</sup>N-MLLE domain + LARP1-F428A 417-437

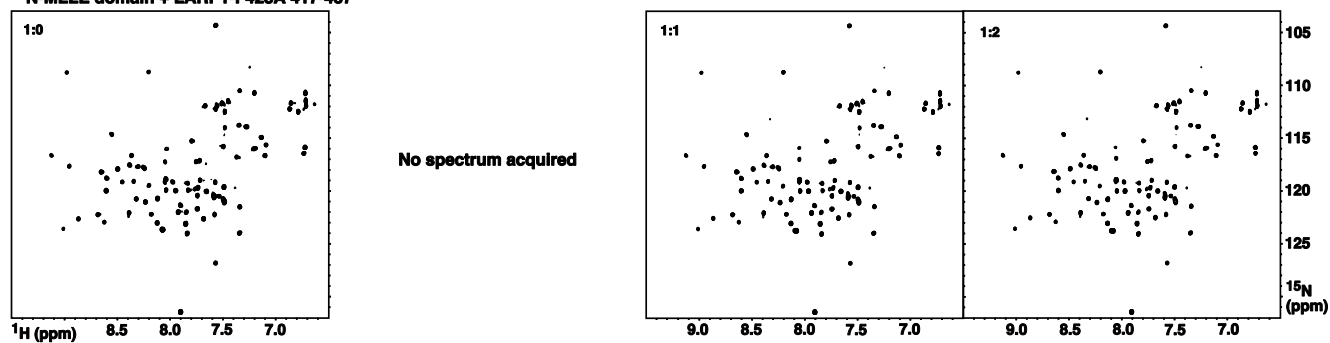

<sup>15</sup>N-MLLE domain + LARP1 399-540

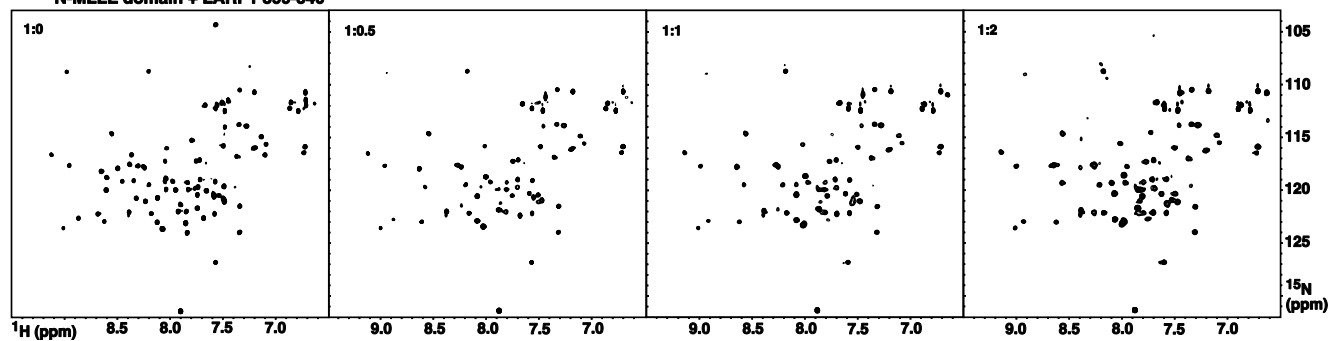

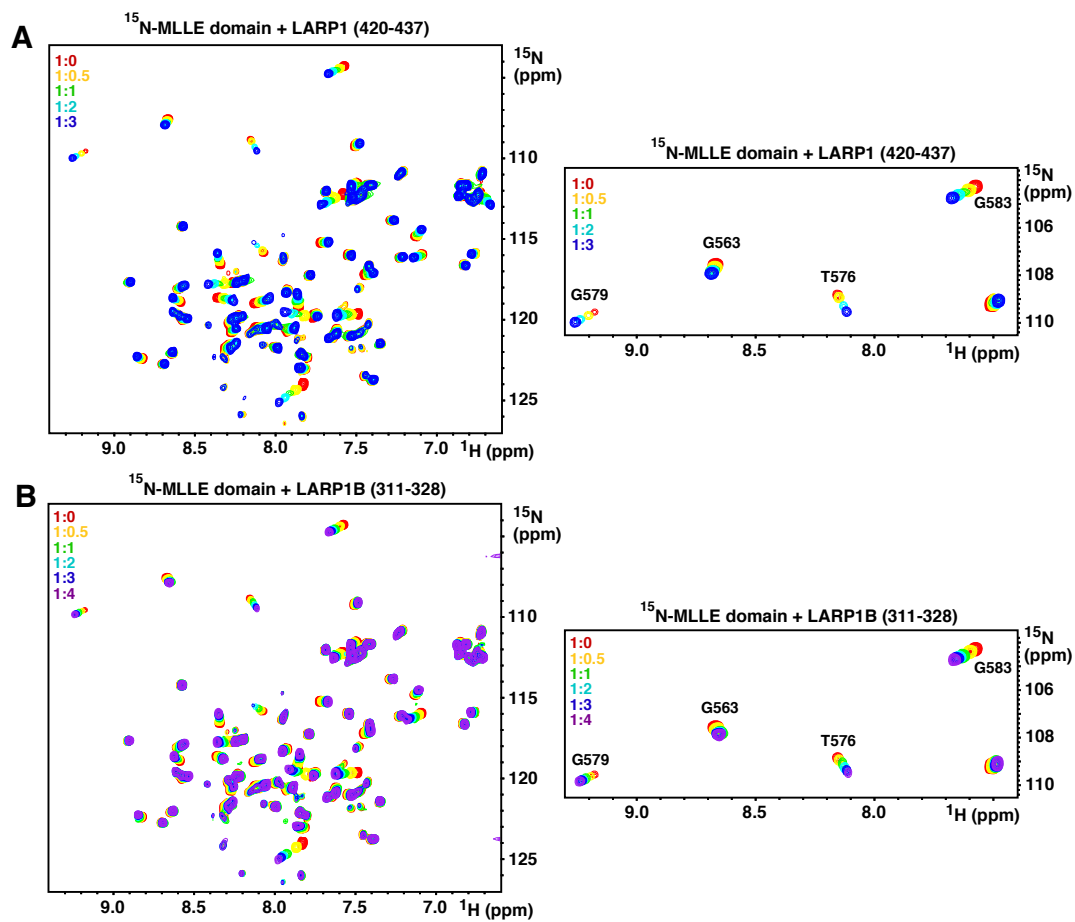

Supplement: KRNB_A_1860376_SM8844.pdf [file KRNB_A_1860376_SM8844.pdf]
